# Supplementary material
Source: Frontiers journal article supplement (https://www.frontiersin.org/articles/350724)

Four alternatives for  
electron transfer to PcrA

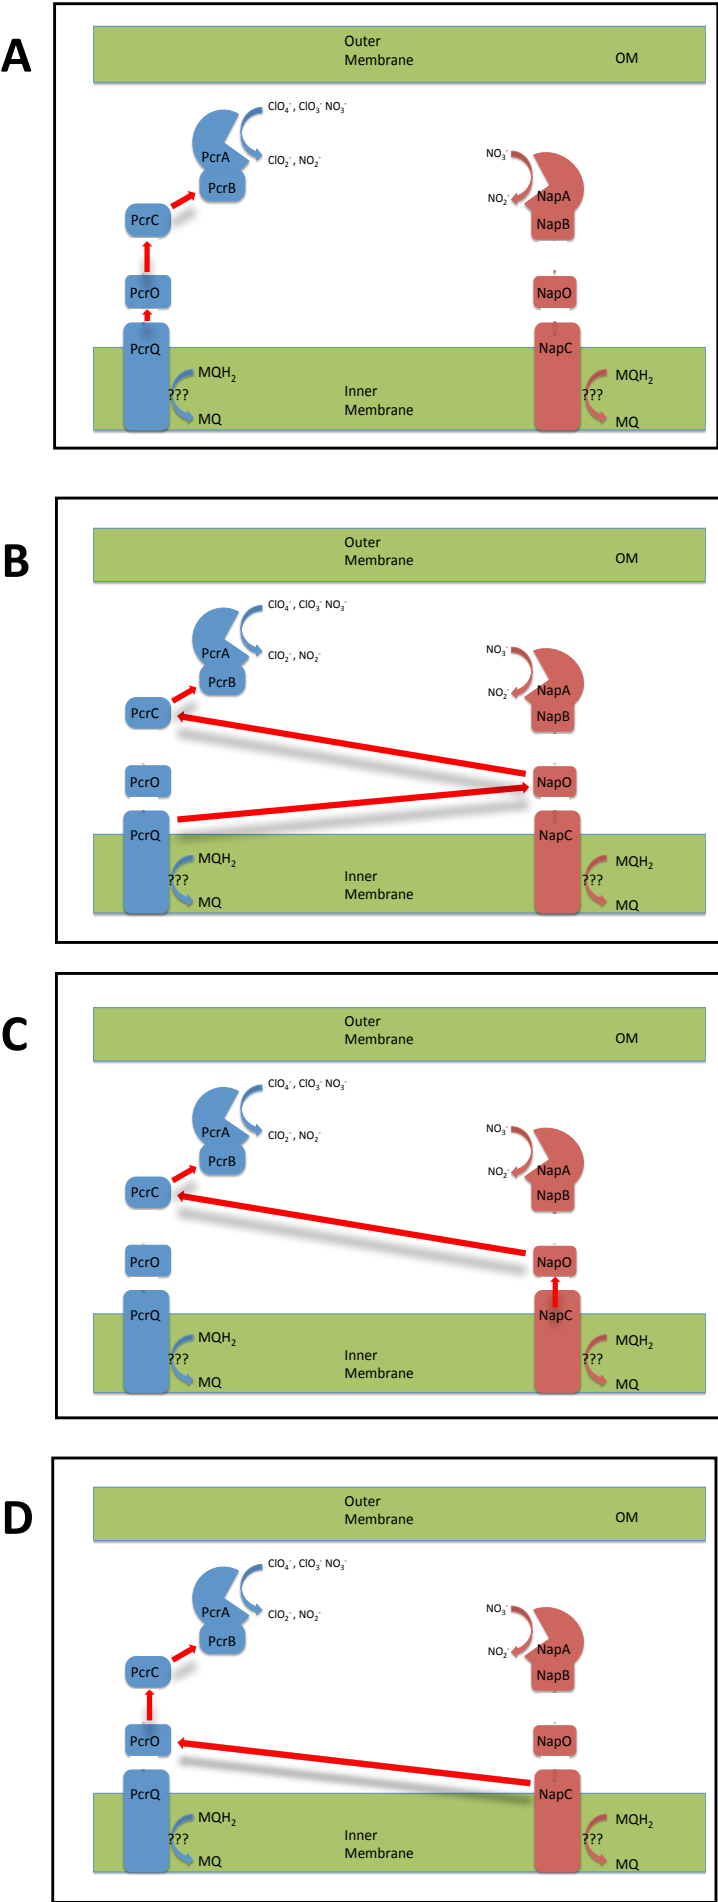

Supplement: Image_2.PDF [file Image_2.PDF]
